# Supplementary material for: Effect of ACASI on Reporting of Abortion and Other Pregnancy Outcomes in the US National Survey of Family Growth
Source: PubMed Central journal article supplement (PMC6166437; doi:10.1111/sifp.12068), 2018-07-24
Supplement: NIHMS986703-supplement-Supporting_information.pdf [file NIHMS986703-supplement-Supporting_information.pdf]

**Appendix 1: Ratios of number of women reporting abortions, miscarriages, and births in the last five years in ACASI to Face-to-Face modes, by women's characteristics: 2006-2010 National Survey of Family Growth**

|                                              | Abortions |             | Miscarriages |             | Births |             |
|----------------------------------------------|-----------|-------------|--------------|-------------|--------|-------------|
|                                              | Ratio     | 95% CI      | Ratio        | 95% CI      | Ratio  | 95% CI      |
| <b>Total</b>                                 | 1.32      | (1.26-1.38) | 1.41         | (1.37-1.45) | 1.10   | (1.09-1.12) |
| <b>Age group</b>                             |           |             |              |             |        |             |
| 15-24                                        | 1.14*     | (1.08-1.20) | 1.36         | (1.28-1.44) | 1.01*  | (0.99-1.03) |
| 25-34 ( <i>ref</i> )                         | 1.31      | (1.21-1.41) | 1.42         | (1.36-1.49) | 1.07   | (1.05-1.08) |
| 35-44                                        | 2.05*     | (1.71-2.39) | 1.44         | (1.35-1.54) | 1.30*  | (1.25-1.34) |
| <b>Race/Ethnicity</b>                        |           |             |              |             |        |             |
| White (Non-Latina) ( <i>ref</i> )            | 1.21      | (1.13-1.29) | 1.22         | (1.17-1.28) | 1.07   | (1.05-1.09) |
| Black (Non-Latina)                           | 1.21      | (1.14-1.28) | 1.60*        | (1.50-1.70) | 1.17*  | (1.14-1.20) |
| Other (Non-Latina)                           | 1.39      | (1.14-1.64) | 1.54*        | (1.29-1.79) | 1.14*  | (1.09-1.19) |
| Latina                                       | 1.74*     | (1.54-1.95) | 1.56*        | (1.45-1.67) | 1.09   | (1.07-1.11) |
| <b>Poverty level income</b>                  |           |             |              |             |        |             |
| 0-99%                                        | 1.39*     | (1.28-1.49) | 1.65*        | (1.53-1.77) | 1.10*  | (1.08-1.12) |
| 100-299%                                     | 1.31      | (1.21-1.41) | 1.38*        | (1.31-1.44) | 1.12*  | (1.10-1.14) |
| 300%> ( <i>ref</i> )                         | 1.25      | (1.15-1.34) | 1.17         | (1.11-1.23) | 1.08   | (1.06-1.10) |
| <b>Marital status</b>                        |           |             |              |             |        |             |
| Currently married ( <i>ref</i> )             | 1.93      | (1.62-2.23) | 1.26         | (1.20-1.31) | 1.08   | (1.06-1.09) |
| Previously married                           | 1.46*     | (1.26-1.67) | 1.57*        | (1.44-1.71) | 1.21*  | (1.17-1.26) |
| Never married                                | 1.19*     | (1.14-1.24) | 1.50*        | (1.43-1.58) | 1.10*  | (1.08-1.12) |
| <b>Religious service attendance</b>          |           |             |              |             |        |             |
| Less than once a month/ Never ( <i>ref</i> ) | 1.19      | (1.12-1.25) | 1.40         | (1.34-1.45) | 1.09   | (1.07-1.11) |
| Once a month or more                         | 1.60*     | (1.44-1.76) | 1.42         | (1.36-1.49) | 1.12*  | (1.10-1.14) |

\* p < 0.05 (*ref*) indicates the reference category for each variable

**Appendix 2: Ratios of number of women reporting abortions, miscarriages, and births in the last five years in ACASI to Face-to-Face modes, by women's characteristics: 2006-2010 National Survey of Family Growth: 2002 National Survey of Family Growth**

|                                                 | Abortions |             | Miscarriages |             | Births |             |
|-------------------------------------------------|-----------|-------------|--------------|-------------|--------|-------------|
|                                                 | Ratio     | 95% CI      | Ratio        | 95% CI      | Ratio  | 95% CI      |
| <b>Total</b>                                    | 1.14      | (1.13-1.16) | 1.12         | (1.11-1.14) | 1.00   | (1.00-1.01) |
| <b>Age group</b>                                |           |             |              |             |        |             |
| 15-24                                           | 1.16      | (1.11-1.22) | 1.21*        | (1.17-1.26) | 1.03*  | (1.01-1.04) |
| 25-34 ( <i>ref</i> )                            | 1.14      | (1.11-1.16) | 1.11         | (1.08-1.14) | 1.00   | (0.99-1.00) |
| 35-44                                           | 1.14      | (1.11-1.17) | 1.10         | (1.09-1.12) | 1.00   | (0.99-1.00) |
| <b>Race/Ethnicity</b>                           |           |             |              |             |        |             |
| White (Non-Latina) ( <i>ref</i> )               | 1.09      | (1.06-1.11) | 1.06         | (1.04-1.07) | 1.00   | (1.00-1.01) |
| Black (Non-Latina)                              | 1.15*     | (1.12-1.18) | 1.20*        | (1.15-1.26) | 1.01   | (1.00-1.01) |
| Other (Non-Latina)                              | 1.20*     | (1.11-1.30) | 1.15*        | (1.06-1.23) | 1.02^  | (1.00-1.04) |
| Latina                                          | 1.27*     | (1.20-1.35) | 1.18*        | (1.14-1.22) | 1.00*  | (0.99-1.00) |
| <b>Poverty level income</b>                     |           |             |              |             |        |             |
| 0-99%                                           | 1.20*     | (1.15-1.25) | 1.22*        | (1.18-1.25) | 1.01   | (1.00-1.01) |
| 100-299%                                        | 1.15*     | (1.12-1.17) | 1.10*        | (1.08-1.13) | 1.00*  | (0.99-1.00) |
| 300%> ( <i>ref</i> )                            | 1.11      | (1.09-1.14) | 1.08         | (1.06-1.10) | 1.01   | (1.00-1.01) |
| <b>Marital status</b>                           |           |             |              |             |        |             |
| Currently married ( <i>ref</i> )                | 1.15      | (1.12-1.18) | 1.08         | (1.06-1.10) | 1.00   | (0.99-1.00) |
| Previously married                              | 1.11*     | (1.07-1.14) | 1.10         | (1.07-1.13) | 1.01*  | (1.00-1.01) |
| Never married                                   | 1.16      | (1.13-1.19) | 1.21*        | (1.17-1.25) | 1.02*  | (1.01-1.03) |
| <b>Religious service attendance</b>             |           |             |              |             |        |             |
| Less than once a month/<br>Never ( <i>ref</i> ) | 1.11      | (1.09-1.13) | 1.11         | (1.09-1.13) | 1.01   | (1.00-1.01) |
| Once a month or more                            | 1.20*     | (1.17-1.23) | 1.13         | (1.11-1.15) | 1.00^  | (1.00-1.01) |

\* p < 0.05 (*ref*) indicates the reference category for each variable
